# Supplementary material for: Normalized LST is an efficient biomarker for homologous recombination deficiency and Olaparib response in ovarian carcinoma
Source: bioRxiv or medRxiv preprint supplement (doi:10.1101/2022.08.22.22278669), 2022-08-23
Supplement: Supplementary file [file media-1.pdf]

# Normalized LST is an efficient biomarker for homologous recombination deficiency and Olaparib response in ovarian carcinoma – Supplementary Figures

Yann Christinat<sup>1</sup>, Liza Ho<sup>1</sup>, Sophie Clément<sup>2</sup>, Catherine Genestie<sup>3</sup>, Jalid Sehouli<sup>4</sup>, Antonio Gonzalez Martin<sup>5</sup>, Ursula Denison<sup>6</sup>, Keiichi Fujiwara<sup>7</sup>, Ignace Vergote<sup>8</sup>, Germana Tognon<sup>9</sup>, Sakari Hietanen<sup>10</sup>, Isabelle Ray-Coquard<sup>11</sup>, Eric Pujade-Lauraine<sup>12</sup>, Thomas A. McKee<sup>1</sup>

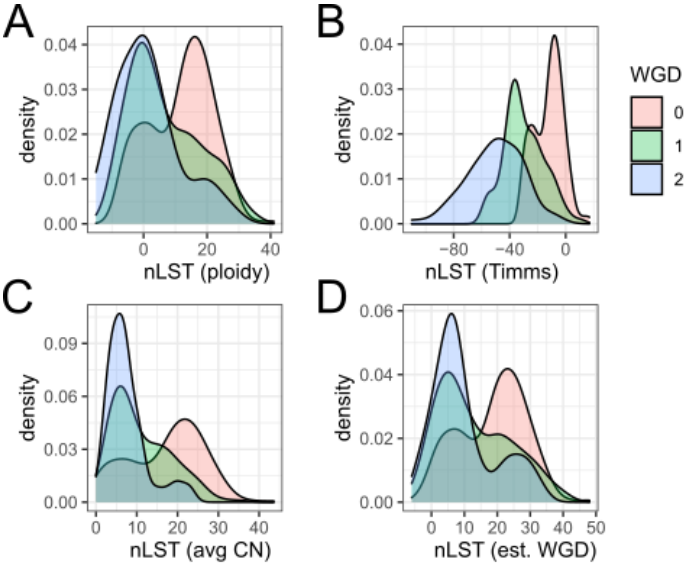

**Figure S1.** Normalized LST score distribution according to different methods and the number of WGD events as given by the ABSOLUTE software. A) Ploidy-based method with  $k=3.5$ . B) Ploidy-based method with  $k=15.5$ . C) Method based on the average copy number. D) WGD-based method.

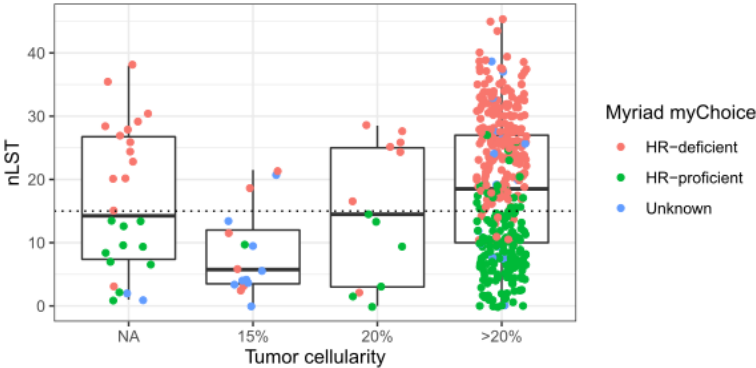

**Figure S2.** Distribution of nLST scores with respect to the tumor content as estimated by the Oncoscan analysis software.

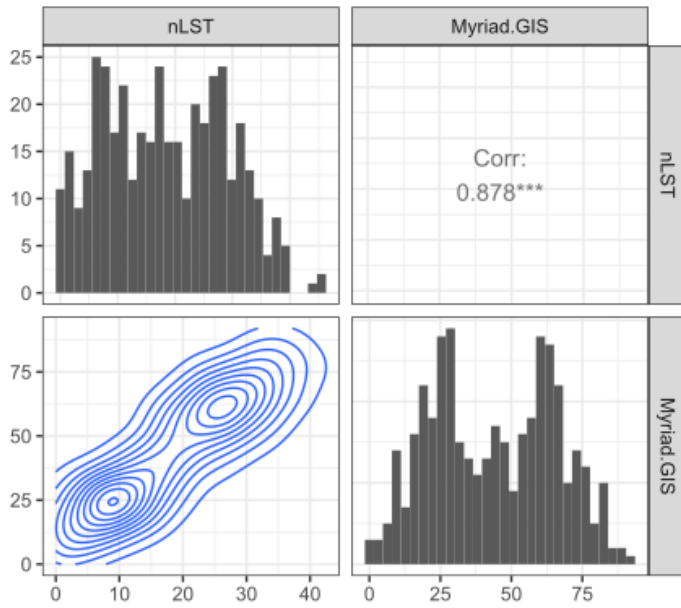

**Figure S3.** Distribution for the nLST score and Myriad GIS on 405 patients from the PAOLA-1 trial and their paired comparison.

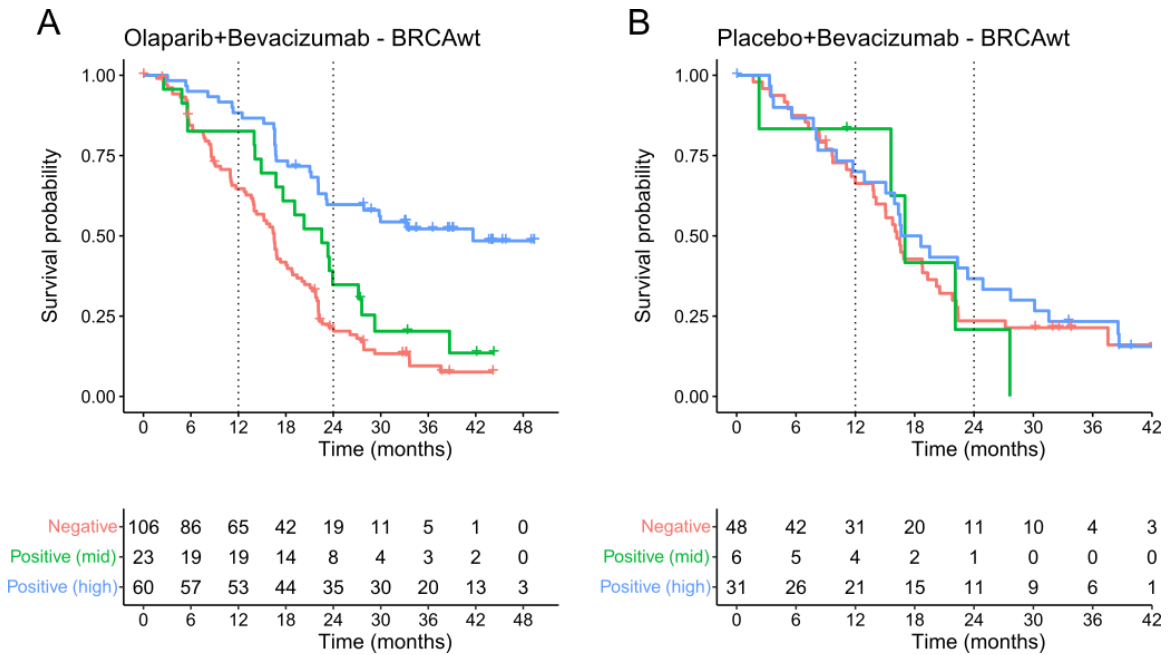

**Figure S4.** Kaplan-Meier plot of a three-way classification of the Myriad GIS score, with thresholds at 33 and 42, in the BRCA wild-type population upon A) Olaparib+Bevacizumab and B) Placebo+Bevacizumab treatment.
